# Supplementary material
Source: PubMed Central journal article supplement (PMC2737057)
Supplement: supp_2.9-10.490_DMM002378FigS1.pdf [file supp_2.9-10.490_DMM002378FigS1.pdf]

|       |            |                                                                                        |
|-------|------------|----------------------------------------------------------------------------------------|
| Fly   | 424        | <b>RAEDAFSSKLG</b> YEEHIPGQTRDWNEELQTTRELPRKTLPERLLRERAIFK <b>VHGDFVTAAT</b>           |
| Human | 335        | <b>RAEDAYTSRLG</b> YEEHIPGQTRDWNEELQTTRELPRK <b>NLPERLLRE-AIFKVHSDFTAAT</b>            |
| Fly   |            | <b>RGAMAVIDGNVLA</b> INP <b>GEDTKMQMFIWNNIFFSMG</b> FDVRDHY <b>KELGGDAAAFVAPRYDLH</b>  |
| Human |            | <b>RGAMAVIDGNVMA</b> INP <b>SEETKMQMFIWNNIFFSLG</b> FDVRDHY <b>KDFGGDVAAAYVAPTNDLN</b> |
| Fly   |            | <b>GVRVYNAVDIEGLYTLGT</b> VVVDYRGYRVTAQSIIPGILERE <b>QEQSVVYGSIDFGKTVLSH</b>           |
| Human |            | <b>GVRTYNAVDVEGLYTLGT</b> VVVDYR-YRVTAQSIIPGILERD <b>QEQSVIYGSIDFGKTVVSH</b>           |
| Fly   |            | <b>PKYLELLRQAGKHLKILPHVVLNERDEPVELCSSVECKGIIGNDGRHYILDLLR</b> TFPPDV                   |
| Human |            | <b>PRYLELLERTSRPLKILRHQVLNDRDEEVELCSSVECKGIIGNDGRHYILDLLR</b> -FPPDL                   |
| Fly   | <b>NFL</b> | 666                                                                                    |
| Human | <b>NFL</b> | 577                                                                                    |
